# Supplementary material
Source: PubMed Central journal article supplement (PMC1478186)
Supplement: 7601110s1.pdf [file 7601110s1.pdf]

## Supplemental figure 1

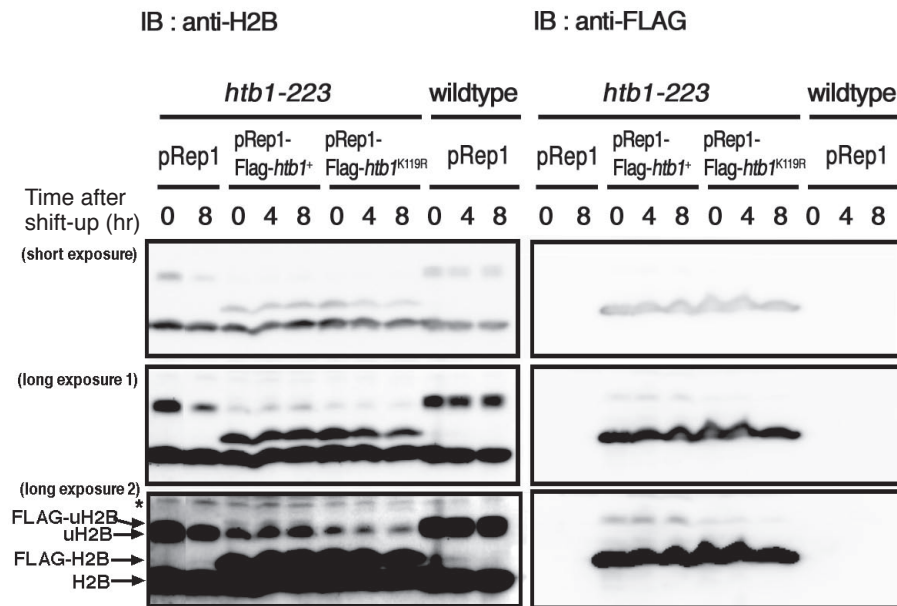

### Supplemental figure 1.

Effect of ectopic overexpression of FLAG-tagged wild-type H2B or H2BK119R under the control of the inducible *nmt1* promoter. Immunoblot patterns using anti-H2B and anti-FLAG. Cell extracts of *htb1-223* cells ectopically expressing wild-type H2B (pRep1-Flag-*htb1*<sup>+</sup>) or H2BK119R (pRep1-Flag-*htb1*<sup>K119R</sup>) were tested. The *htb1-223* mutant cells carrying the plasmids were asynchronously grown in the presence of thiamine at 26°C, and after removal of thiamine and followed incubation for 24hr, the cultures were shifted to 36°C. Asterisk indicates contamination bands.
